# Supplementary material for: Multifunctional carbon dots as efficient fluorescent nanotags for tracking cells through successive generations
Source: Royal Society of Chemistry journal article supplement (doi:10.1039/c6tb01178k), 2016-01-01
Supplement: c6tb01178k1.pdf [file c6tb01178k1.pdf]

**Supporting Information**

**Multifunctional carbon dots as efficient fluorescent nanotags for tracking cells through successive generations**

Bharat Bhushan,<sup>a†</sup> S. Uday Kumar,<sup>a†</sup> and P. Gopinath<sup>\*ab</sup>

<sup>a</sup>Nanobiotechnology Laboratory, Centre for Nanotechnology, <sup>b</sup>Department of Biotechnology,  
Indian Institute of Technology Roorkee, Roorkee, Uttarakhand-247667, India.

(†- These authors contributed equally to the work)

Corresponding author: Tel. +91-1332-285650; Fax. +91-1332-273560;  
\*E.mail: pgopifnt@iitr.ernet.in; genegopi@gmail.com

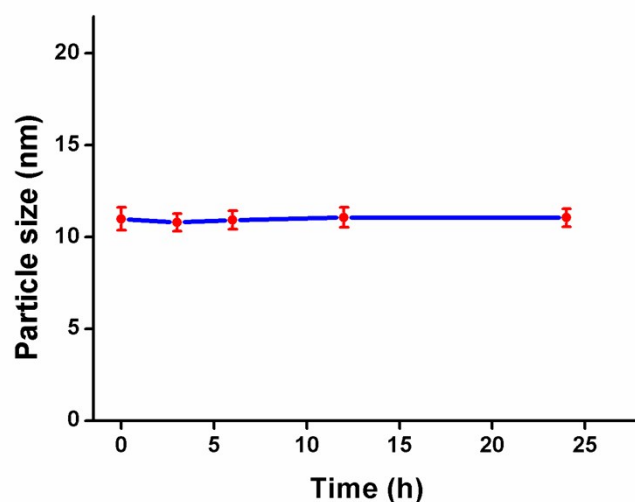

**Fig. S1** The variation in particle sizes of CDs in phosphate-buffered saline containing 50% (v/v) FBS for 24 h at 25°C (n=3).

| Sample | $a_1$  | $\tau_1(\text{ns})$ | $a_2$  | $\tau_2(\text{ns})$ | $a_3$  | $\tau_3(\text{ns})$ | $\tau_{\text{av}}(\text{ns})$ | $\chi^2$ |
|--------|--------|---------------------|--------|---------------------|--------|---------------------|-------------------------------|----------|
| CDs    | 0.4728 | 4.487               | 0.1221 | 0.780               | 0.4051 | 15.207              | 8.377                         | 1.171    |

**Table S1.** Tabular representation of fluorescence lifetime calculation of CDs.

Average lifetime ( $\tau_{\text{av}}$ ) was calculated by using the following equation:

$$\tau_{\text{av}} = a_1\tau_1 + a_2\tau_2 + a_3\tau_3$$

where  $\tau_1$ ,  $\tau_2$ ,  $\tau_3$  were the first, second and third component of the decay time of CDs and  $a_1$ ,  $a_2$ ,  $a_3$  were the corresponding relative weightings (emission %) of these components, respectively.
